# Supplementary material
Source: PubMed Central journal article supplement (PMC2841685)
Supplement: NIHMS184210-supplement-supplementary_data.pdf [file NIHMS184210-supplement-supplementary_data.pdf]

**Supplementary Table S1.** HIV-1 protein regions targeted by T cells and by CD3neg cell subsets

| Cell Subsets                                | n <sup>a</sup> | Gag           | Pol            | Nef            | Reg <sup>b</sup> | Env              |
|---------------------------------------------|----------------|---------------|----------------|----------------|------------------|------------------|
| <b>HIV-infected mothers</b>                 |                |               |                |                |                  |                  |
| CD3pos subsets                              |                |               |                |                |                  |                  |
| CD8 T cells                                 |                |               |                |                |                  |                  |
| Median (Range) <sup>c</sup>                 | 79             | 0.43 (0-5.50) | 0.27 (0-2.71)  | 0.39 (0-3.09)  | 0.19 (0-3.0)     | 0.20 (0-3.16)    |
| No. (%) <sup>d</sup>                        |                | 64 (81)       | 60 (75.9)      | 65 (82.3)      | 54 (68.4)        | 52 (65.8)        |
| CD4 T cells                                 |                |               |                |                |                  |                  |
| Median (Range)                              | 79             | 0 (0-0.73)    | 0 (0-0.5)      | 0 (0-0.37)     | 0 (0-1.48)       | 0 (0-3.78)       |
| No. (%)                                     |                | 25 (31.6)     | 17 (21.5)      | 14 (17.7)      | 23 (29.1)        | 32 (40.5)        |
| CD3neg subsets                              |                |               |                |                |                  |                  |
| CD3neg                                      |                |               |                |                |                  |                  |
| Median (Range)                              | 79             | 0 (0-3.44)    | 0 (0-6.14)     | 0 (0-1.25)     | 0 (0-18.66)      | 1.64 (0-18.58)   |
| No. (%)                                     |                | 0             | <b>1 (1.3)</b> | 0              | <b>16 (20.3)</b> | <b>25 (31.6)</b> |
| CD3-CD8+                                    |                |               |                |                |                  |                  |
| Median (Range)                              | 79             | 0 (0-5.36)    | 0 (0-6.74)     | 0 (0-3.07)     | 0.23 (0-30.72)   | 2.79 (0-19.72)   |
| No. (%)                                     |                | 0             | <b>2 (2.5)</b> | 0              | <b>17 (21.5)</b> | <b>34 (43)</b>   |
| CD3-CD8-                                    |                |               |                |                |                  |                  |
| Median (Range)                              | 79             | 0 (0-2.40)    | 0.04 (0-6.14)  | 0 (0-1.78)     | 0.01 (0-18.91)   | 1.22 (0-18.29)   |
| No. (%)                                     |                | 0             | 0              | 0              | <b>12 (15.2)</b> | <b>21 (26.6)</b> |
| NK <sup>+e</sup>                            |                |               |                |                |                  |                  |
| Median (Range)                              | 50             | 0 (0-4.79)    | 0 (0-3.80)     | 0 (0-6.27)     | 0.58 (0-33.86)   | 2.01 (0-15.63)   |
| No. (%)                                     |                | 0             | 0              | 0              | <b>11 (22)</b>   | <b>18 (36)</b>   |
| NK+CD8+                                     |                |               |                |                |                  |                  |
| Median (Range)                              | 50             | 0 (0-5.02)    | 0 (0-3.06)     | 0 (0-3.84)     | 0.21 (0-26.76)   | 1.63 (0-15.20)   |
| No. (%)                                     |                | 0             | 0              | 0              | <b>10 (20)</b>   | <b>18 (36)</b>   |
| NK+CD8-                                     |                |               |                |                |                  |                  |
| Median (Range)                              | 50             | 0 (0-5.10)    | 0.28 (0-5.01)  | 0 (0-3.53)     | 0.72 (0-36.72)   | 2.30 (0-18.62)   |
| No. (%)                                     |                | 0             | 0              | 0              | <b>11 (22)</b>   | <b>17 (34)</b>   |
| <b>Infants born to HIV-infected mothers</b> |                |               |                |                |                  |                  |
| CD3pos subsets                              |                |               |                |                |                  |                  |
| CD8 T cells <sup>f</sup>                    |                |               |                |                |                  |                  |
| Median (Range)                              | 76             | 0 (0-6.72)    | 0 (0-0.28)     | 0 (0-1.81)     | 0 (0-1.58)       | 0 (0-0.75)       |
| No. (%)                                     |                | 8 (9.9)       | 4 (4.9)        | 10 (12.3)      | 8 (9.9)          | 6 (7.4)          |
| CD4 T cells <sup>f</sup>                    |                |               |                |                |                  |                  |
| Median (Range)                              | 76             | 0 (0-0.41)    | 0 (0-0.99)     | 0 (0-0.41)     | 0 (0-0.54)       | 0 (0-0.39)       |
| No. (%)                                     |                | 2 (2.5)       | 0              | 4 (4.9)        | 2 (2.5)          | 3 (3.7)          |
| CD3neg subsets                              |                |               |                |                |                  |                  |
| CD3neg                                      |                |               |                |                |                  |                  |
| Median (Range)                              | 76             | 0.02 (0-2.31) | 0 (0-1.39)     | 0 (0-2.34)     | 0 (0-2.85)       | 0.05 (0-9.70)    |
| No. (%)                                     |                | 0             | 0              | 0              | 0                | <b>7 (9.2)</b>   |
| CD3-CD8+                                    |                |               |                |                |                  |                  |
| Median (Range)                              | 76             | 0 (0-4.20)    | 0 (0-3.88)     | 0 (0-7.89)     | 0 (0-9.81)       | 0.21 (0-23.44)   |
| No. (%)                                     |                | 0             | <b>1 (1.3)</b> | <b>1 (1.3)</b> | <b>4 (5.3)</b>   | <b>12 (15.8)</b> |
| CD3-CD8-                                    |                |               |                |                |                  |                  |
| Median (Range)                              | 76             | 0 (0-1.84)    | 0 (0-1.46)     | 0 (0-0.94)     | 0.02 (0-1.96)    | 0.04 (0-5.62)    |
| No. (%)                                     |                | 0             | 0              | 0              | 0                | <b>3 (3.9)</b>   |
| NK <sup>+e</sup>                            |                |               |                |                |                  |                  |
| Median (Range)                              | 52             | 0.14 (0-1.45) | 0.17 (0-2.07)  | 0.27 (0-4.16)  | 0.05 (0-7.49)    | 0.08 (0-20.85)   |
| No. (%)                                     |                | 0             | 0              | <b>1 (1.9)</b> | <b>3 (5.8)</b>   | <b>6 (11.5)</b>  |
| NK+CD8+                                     |                |               |                |                |                  |                  |
| Median (Range)                              | 52             | 0 (0-1.65)    | 0 (0-1.53)     | 0 (0-5.44)     | 0.01 (0-9.06)    | 0.22 (0-24.68)   |
| No. (%)                                     |                | 0             | 0              | <b>1 (1.9)</b> | <b>3 (5.8)</b>   | <b>6 (11.5)</b>  |
| NK+CD8-                                     |                |               |                |                |                  |                  |
| Median (Range)                              | 52             | 0 (0-2.03)    | 0 (0-1.15)     | 0.09 (0-3.80)  | 0.48 (0-6.57)    | 1.57 (0-19.52)   |
| No. (%)                                     |                | 0             | 0              | <b>1 (1.9)</b> | <b>2 (3.8)</b>   | <b>6 (11.5)</b>  |

<sup>a</sup>Total sample numbers tested for each cell subset

<sup>b</sup>Reg region peptides (Tat, Rev, Vif, Vpu, Vpr) are combined

<sup>c</sup>Median of percentage of cell subset expressing IFN- $\gamma$  (after background subtraction); range of these responses in parentheses

<sup>d</sup>Number of HIV-specific CD3neg responders with frequency in parentheses, positive responders are shown in bold

<sup>e</sup>NK+ used throughout indicates CD3-CD56+

<sup>f</sup>Infants with detectable HIV-specific CD4 or CD8 T cell responses were all HIV-1 infected

Note: CD3neg cell subset responses are considered positive if values >3% and at least 2-fold greater than background (after background subtraction from the unstimulated control); CD4 and CD8 T cell responses are considered positive if >0.1% following subtraction of background.

Where top range values are >3% for CD3neg responses but indicate that no individuals are positive for responses in that subset, these were because of high background levels of stimulation that then did not meet the criterion of at least 2-fold above background for the outlier individuals.

**Supplementary Table S2.** Percentage of CD3neg cell subsets of mothers and infants with positive responses to HIV-1 peptide pools<sup>a</sup>

| ID    | Peptide pool | Mother       |              |              |            | Infant      |             |              |              |              |            |             |             |
|-------|--------------|--------------|--------------|--------------|------------|-------------|-------------|--------------|--------------|--------------|------------|-------------|-------------|
|       |              | CD3-<br>CD3- | CD3-<br>CD8+ | CD3-<br>CD8- | NK+<br>NK+ | NK+<br>CD8+ | NK+<br>CD8- | CD3-<br>CD3- | CD3-<br>CD8+ | CD3-<br>CD8- | NK+<br>NK+ | NK+<br>CD8+ | NK+<br>CD8- |
| 001   | Env          | 8.14         | 10.82        | 7.05         | ND         |             |             |              | ND           |              |            |             | ND          |
|       | Reg          | 4.67         | 5.07         | 4.62         |            |             |             |              |              |              |            |             |             |
| 003   | Env          | 3.25         | 4.11         | -            | ND         |             |             |              | ND           |              |            |             | ND          |
|       | Reg          | 8.8          | 10.22        | 7.23         |            |             |             |              |              |              |            |             |             |
| 004   | Env          | 5.92         | 6.87         | 5.78         | ND         |             |             |              | ND           |              |            |             | ND          |
| 008   | Env          | 18.58        | 19.72        | 18.29        | ND         |             |             |              | ND           |              |            |             | ND          |
|       | Reg          | 13.18        | 15.92        | 12.39        |            |             |             |              |              |              |            |             |             |
| 010   | Env          | 8.78         | 13.16        | 9.38         | ND         |             |             |              | ND           |              |            |             | ND          |
|       | Reg          | 12.98        | 18.06        | 13.98        |            |             |             |              |              |              |            |             |             |
| 026   | Reg          | 3.07         | 4.88         | -            | ND         |             |             |              | ND           |              |            |             | ND          |
| 027   | Env          | 4.28         | 8.31         | 3.94         | ND         |             |             |              | ND           |              |            |             | ND          |
| 029   | Pol          | -            | 3.21         | -            | ND         |             |             |              | ND           |              |            |             | ND          |
| 030   | Env          | 5.74         | 4.24         | 5.84         | ND         |             |             |              | -            | 6.92         | -          |             | ND          |
|       | Pol          | 6.14         | 6.74         | 6.14         |            |             |             |              | -            | -            | -          |             |             |
| 031   | Env          | -            | 3.09         | -            | ND         |             |             |              | 4.26         | 8.09         | -          |             | ND          |
| 035   | Env          | 4.7          | 10.56        | 4.33         | ND         |             |             |              | -            | 20.33        | -          |             | ND          |
| 038i  | Env          | -            | 4.65         | -            | ND         |             |             |              | -            | -            | -          |             | ND          |
| 038ii | Env          | -            | 5.52         | -            | 3.15       | 4.26        | 4.97        |              | -            | -            | -          |             | ND          |
| 039   | Env          | 3.25         | 5.38         | -            | ND         |             |             |              | -            | -            | -          |             | ND          |
| 042   | Env          | 5.16         | 5.55         | 5.7          | 4.92       | 3.29        | 5.2         | 6.21         | 14.89        | 4.06         | 6.33       | 16.05       | 4.48        |
| 043   | Env          | -            | -            | -            | ND         |             |             |              | -            | 3.05         | -          |             | ND          |
|       | Reg          | -            | -            | -            |            |             |             |              | -            | 3.91         | -          |             |             |
| 047   | Env          | 4.95         | 9.82         | 3.92         | 6.89       | 7.11        | 7.38        |              | -            | -            | -          | -           | -           |
| 048i  | Env          | 11.65        | 17.8         | 9.98         | ND         |             |             |              | -            | -            | -          |             | ND          |
|       | Reg          | 21.25        | 32.2         | 16.63        |            |             |             |              | -            | 11.43        | -          |             |             |
| 048ii | Env          | 10.28        | 13.62        | 9.44         | 11.6       | 14.3        | 12.3        | 9.59         | 22.28        | 5.93         | 16.89      | 20.46       | 16.37       |
|       | Reg          | 18.22        | 25.04        | 17.4         | 22.6       | 22.7        | 23.9        |              | -            | 9.74         | -          | 7.49        | 9.06        |
|       | Nef          | -            | -            | -            | -          | -           | -           |              | -            | 6.01         | -          | 4.16        | 5.44        |
| 052   | Env          | -            | 4.12         | -            | ND         |             |             |              | -            | -            | -          |             | ND          |
|       | Reg          | 3.85         | 4.78         | 3.89         |            |             |             |              | -            | -            | -          |             |             |
| 053   | Env          | 3.82         | 6.2          | 4.41         | ND         |             |             |              | -            | -            | -          |             | ND          |
|       | Reg          | 13.28        | 19.05        | 13.86        |            |             |             |              | -            | -            | -          |             |             |
| 069   | Env          | 3.24         | 4.44         | 3.86         | 4.28       | 4.84        | 5.51        |              | -            | -            | -          | -           | -           |
| 071   | Env          | 3.02         | 6.77         | -            | 5.6        | 3.5         | 5.99        |              | -            | 18.38        | -          | 9.9         | 16.19       |
|       | Pol          | -            | -            | -            | -          | -           | -           |              | -            | 3.88         | -          | -           | -           |
| 155   | Reg          | 7.5          | 6.51         | 7.49         | 11.77      | 5.97        | 15.44       |              | -            | 3.38         | -          | ND          | -           |
| 211   | Env          | -            | -            | -            | -          | -           | -           | 3.47         | 22.97        | -            | 20.85      | 24.68       | 19.52       |
| 305   | Env          | 4.57         | 6.95         | 4.19         | 7.29       | 7.94        | 6.79        | 5.05         | 6.64         | 4.52         | 3.24       | 3.84        | 3.66        |
| 306   | Env          | -            | -            | -            | -          | -           | -           |              | -            | 3.91         | -          | 3.9         | -           |
|       | Reg          | 3.83         | 4.87         | 3.85         | 4.99       | 4.45        | 6.67        |              | -            | -            | -          | -           | -           |
| 307   | Env          | 8.72         | 14.66        | 7.54         | 15         | 11.87       | 14.68       |              | -            | -            | -          | -           | -           |
| 311   | Env          | -            | 4.14         | -            | 3.5        | 4.07        | -           |              | -            | -            | -          | -           | -           |
|       | Reg          | -            | 6.27         | -            | 5.29       | 5.56        | 3.36        |              | -            | -            | -          | -           | -           |
| 318   | Env          | 5.83         | 11.14        | 4.75         | 6.3        | 8.65        | 4.48        |              | -            | -            | -          | -           | -           |
| 330   | Env          | 11.19        | 17.12        | 10.32        | 15.63      | 15.2        | 16.39       | 3.69         | 15.04        | -            | 11.1       | 12.13       | 10.83       |
| 425   | Env          | 4.27         | 13.12        | -            | 4.49       | 6.64        | -           |              | -            | -            | -          | -           | -           |
| 433   | Env          | 4.99         | 5            | 5.27         | 6.09       | 5.03        | 6.24        |              | -            | -            | -          | -           | -           |
|       | Reg          | 18.21        | 18.53        | 18.91        | 25.71      | 19.97       | 26.62       |              | -            | -            | -          | -           | -           |
| 563   | Env          | 12.59        | 11.45        | 13.49        | 14.57      | 12.54       | 18.62       | 3.16         | 23.30        | -            | 18.56      | 23.29       | 10.04       |
|       | Reg          | 16.44        | 14.88        | 17.15        | 21.77      | 16.44       | 23.62       |              | -            | -            | -          | -           | -           |
| 589   | Env          | -            | 4.93         | 4.91         | 5.96       | 5.23        | 6.33        |              | -            | -            | -          | -           | -           |
| 624   | Env          | 4.31         | 7.04         | -            | 6.42       | 6.1         | 6.64        |              | -            | -            | -          | -           | -           |
|       | Reg          | 4.36         | 6.68         | -            | 5.91       | 6.05        | 5.51        |              | -            | -            | -          | -           | -           |
| 649   | Reg          | 6.28         | 16.41        | -            | 11.8       | 18.4        | 5.04        |              | -            | -            | -          | -           | -           |
| 654   | Env          | -            | 4.16         | -            | 3.77       | 4.38        | 3.59        |              | -            | -            | -          | -           | -           |
| 655   | Env          | 11.28        | 11.96        | 11.61        | 15.24      | 10.41       | 15.48       |              | -            | 3.96         | -          | 3.46        | -           |
| 658   | Reg          | 8.03         | 9.69         | -            | 9.71       | 11.1        | 10.3        |              | -            | 3.62         | -          | 4.14        | 4.05        |
| 671   | Env          | -            | 3.03         | -            | -          | -           | -           |              | -            | -            | -          | -           | -           |
|       | Reg          | 17.32        | 30.72        | 14.52        | 33.86      | 26.76       | 36.72       |              | -            | -            | -          | -           | -           |
| 773   | Env          | -            | 3.98         | -            | 3.02       | -           | 3.32        |              | -            | -            | -          | -           | -           |
| 791   | Env          | -            | 5.27         | -            | 3.79       | 6.65        | 4.27        |              | -            | -            | -          | -           | -           |

<sup>a</sup>Positive responses are indicated by values (>3% and at least 2-fold greater than background), negative responses by dashes, ND: Not determined  
NK+ indicates CD3-CD56+

## Supplementary Figure S1 Amino acid regions targeted by CD3-CD56+ NK cells and T cell subsets

Whole HIV-1 subtype C genome mapping was conducted according to methods described in<sup>1</sup> with inclusion of NK cell antibody to CD56. Details of peptides included in pools and matrices that allow determination of the peptide/s stimulating the responses are given in this same publication; example of analysis shown below.

1. Meddows-Taylor, S., Shalekoff, S., Kuhn, L., Gray, G.E. & Tiemessen, C.T. Development of a whole blood intracellular cytokine staining assay for mapping CD4(+) and CD8(+) T-cell responses across the HIV-1 genome. *J Virol Methods* **144**, 115-21 (2007).

**a**

Matrix

|         | 1       | 2       | 3       | 4       | 5       | 6       | 7       | 8       | 9       | 10      | 11      | 12     | 13     | 14     | 15     | 16     | 17     | 18     | 19     | 20     | 21      | 22      | 23      | 24 |
|---------|---------|---------|---------|---------|---------|---------|---------|---------|---------|---------|---------|--------|--------|--------|--------|--------|--------|--------|--------|--------|---------|---------|---------|----|
| Pol 1   | Pol 2   | Pol 3   | Pol 4   | Pol 5   | Pol 6   | Pol 7   | Pol 8   | Pol 9   | Pol 10  | Pol 11  | Pol 12  | Pol 13 | Pol 14 | Pol 15 | Pol 16 | Pol 17 | Pol 18 | Pol 19 | Pol 20 | Pol 21 | Pol 22  | Pol 23  | Pol 24  |    |
| Pol 25  | Pol 26  | Pol 27  | Pol 28  | Pol 29  | Pol 30  | Pol 31  | Pol 32  | Pol 33  | Pol 34  | Pol 35  | Pol 36  | Pol 37 | Pol 38 | Pol 39 | Pol 40 | Pol 41 | Pol 42 | Pol 43 | Pol 44 | Pol 45 | Pol 46  | Pol 47  | Pol 48  |    |
| Pol 49  | Pol 50  | Pol 51  | Pol 52  | Pol 53  | Pol 54  | Pol 55  | Pol 56  | Pol 57  | Pol 58  | Pol 59  | Pol 60  | Pol 61 | Pol 62 | Pol 63 | Pol 64 | Pol 65 | Pol 66 | Pol 67 | Pol 68 | Pol 69 | Pol 70  | Pol 71  | Pol 72  |    |
| Pol 73  | Pol 74  | Pol 75  | Pol 76  | Pol 77  | Pol 78  | Pol 79  | Pol 80  | Pol 81  | Pol 82  | Pol 83  | Pol 84  | Pol 85 | Pol 86 | Pol 87 | Pol 88 | Pol 89 | Pol 90 | Pol 91 | Pol 92 | Rev 1  | Rev 2   | Rev 3   | Rev 4   |    |
| Rev 5   | Rev 6   | Rev 7   | Rev 8   | Rev 9   | Rev 10  | Rev 11  | Rev 12  | Rev 13  | Rev 14  | Tat 1   | Tat 2   | Tat 3  | Tat 4  | Tat 5  | Tat 6  | Tat 7  | Tat 8  | Tat 9  | Tat 10 | Tat 11 | Tat 12  | Vpu 1   | Vpu 2   |    |
| Vpu 3   | Vpu 4   | Vpu 5   | Vpu 6   | Vpu 7   | Vpu 8   | Vpu 9   | Vif 1   | Vif 2   | Vif 3   | Vif 4   | Vif 5   | Vif 6  | Vif 7  | Vif 8  | Vif 9  | Vif 10 | Vif 11 | Vif 12 | Vif 13 | Vif 14 | Vif 15  | Vif 16  | Vif 17  |    |
| Vif 18  | Vif 19  | Vif 20  | Vif 21  | Vif 22  | Vif 23  | Vif 24  | Vpr 1   | Vpr 2   | Vpr 3   | Vpr 4   | Vpr 5   | Vpr 6  | Vpr 7  | Vpr 8  | Vpr 9  | Vpr 10 | Vpr 11 | Env 1  | Env 2  | Env 3  | Env 4   | Env 5   | Env 6   |    |
| Env 7   | Env 8   | Env 9   | Env 10  | Env 11  | Env 12  | Env 13  | Env 14  | Env 15  | Env 16  | Env 17  | Env 18  | Env 19 | Env 20 | Env 21 | Env 22 | Env 23 | Env 24 | Env 25 | Env 26 | Env 27 | Env 28  | Env 29  | Env 30  |    |
| Env 31  | Env 32  | Env 33  | Env 34  | Env 35  | Env 36  | Env 37  | Env 38  | Env 39  | Env 40  | Env 41  | Env 42  | Env 43 | Env 44 | Env 45 | Env 46 | Env 47 | Env 48 | Env 49 | Env 50 | Env 51 | Env 52  | Env 53  | Env 54  |    |
| Env 55  | Env 56  | Env 57  | Env 58  | Env 59  | Env 60  | Env 61  | Env 62  | Env 63  | Env 64  | Env 65  | Env 66  | Env 67 | Env 68 | Env 69 | Env 70 | Env 71 | Env 72 | Env 73 | Env 74 | Env 75 | Env 76  | Env 77  | Env 78  |    |
| Env 79  | Env 80  | Env 81  | Env 82  | Env 83  | Env 84  | Env 85  | Env 86  | Env 87  | Env 88  | Env 89  | Env 90  | Env 91 | Env 92 | Env 93 | Env 94 | Env 95 | Env 96 | Env 97 | Env 98 | Env 99 | Env 100 | Env 101 | Env 102 |    |
| Env 103 | Env 104 | Env 105 | Env 106 | Env 107 | Env 108 | Env 109 | Env 110 | Env 111 | Env 112 | Env 113 | Env 114 | Vif 16 | Vif 17 |        |        |        |        |        |        |        |         |         |         |    |

Matrix

|        | 25     | 26     | 27     | 28     | 29     | 30     | 31     | 32     | 33     | 34     | 35     | 36     | 37     | 38     | 39     | 40     | 41     | 42     | 43     | 44     | 45     | 46     | 47     | 48 |
|--------|--------|--------|--------|--------|--------|--------|--------|--------|--------|--------|--------|--------|--------|--------|--------|--------|--------|--------|--------|--------|--------|--------|--------|----|
| Gag 1  | Gag 2  | Gag 3  | Gag 4  | Gag 5  | Gag 6  | Gag 7  | Gag 8  | Gag 9  | Gag 10 | Gag 11 | Gag 12 | Gag 13 | Gag 14 | Nef 1  | Nef 2  | Nef 3  | Nef 4  | Nef 5  | Nef 6  | Nef 7  | Nef 8  | Nef 9  | Nef 10 |    |
| Gag 15 | Gag 16 | Gag 17 | Gag 18 | Gag 19 | Gag 20 | Gag 21 | Gag 22 | Gag 23 | Gag 24 | Gag 25 | Gag 26 | Gag 27 | Gag 28 | Nef 11 | Nef 12 | Nef 13 | Nef 14 | Nef 15 | Nef 16 | Nef 17 | Nef 18 | Nef 19 | Nef 20 |    |
| Gag 29 | Gag 30 | Gag 31 | Gag 32 | Gag 33 | Gag 34 | Gag 35 | Gag 36 | Gag 37 | Gag 38 | Gag 39 | Gag 40 | Gag 41 | Gag 42 | Nef 21 | Nef 22 | Nef 23 | Nef 24 | Nef 25 | Nef 26 | Nef 27 | Nef 28 | Nef 29 | Nef 30 |    |
| Gag 43 | Gag 44 | Gag 45 | Gag 46 | Gag 47 | Gag 48 | Gag 49 | Gag 50 | Gag 51 | Gag 52 | Gag 53 | Gag 54 | Gag 55 | Gag 56 | Nef 31 | Nef 32 | Nef 33 | Nef 34 | Nef 35 | Nef 36 | Nef 37 | Nef 38 | Nef 39 | Nef 40 |    |
| Gag 57 | Gag 58 | Gag 59 | Gag 60 | Gag 61 | Gag 62 | Gag 63 | Gag 64 | Gag 65 | Gag 66 | Gag 67 | Gag 68 | Gag 69 | Gag 70 | Nef 41 | Nef 42 | Nef 43 | Nef 44 | Nef 45 | Nef 46 | Nef 47 | Nef 48 | Nef 49 | Nef 50 |    |

Pools

|       | 1    | 2     | 3     | 4     | 5      |
|-------|------|-------|-------|-------|--------|
| Pol   | 1-24 | 25-48 | 49-72 | 73-92 |        |
| Rev   | 1-14 |       |       |       |        |
| Tat   | 1-12 |       |       |       |        |
| gp160 | 1-24 | 25-48 | 49-72 | 73-96 | 97-114 |
| Vpu   | 1-9  |       |       |       |        |
| Vif   | 1-12 | 13-24 |       |       |        |
| Gag   | 1-14 | 15-28 | 29-42 | 43-56 | 57-70  |
| Vpr   | 1-11 |       |       |       |        |
| Nef   | 1-10 | 11-20 | 21-30 | 31-40 | 41-50  |

**b**

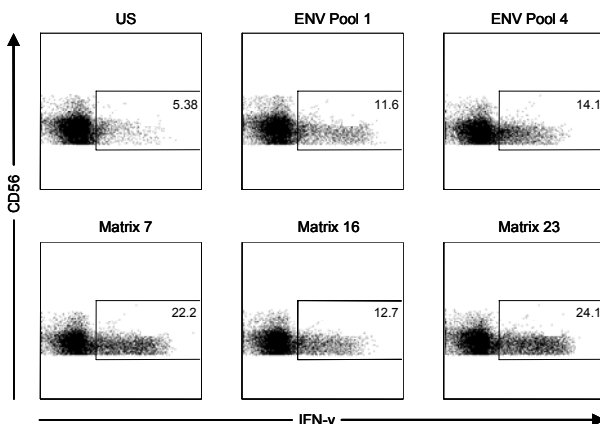

**Supplementary Figure S1** Identification of individual HIV-1 subtype C peptide responses using a pool and matrix screening method. Detectable CD56+ responses in Env pools 1 (peptides 1-24) and 4 (peptides 73-96) and matrices 7, 16 and 23 (a), allowed the identification of Env 13, 22, 77, 85 and 94 as the individual peptides targeted in this patient. (b) Flow cytometric plots showing unstimulated (US), and positive pool and matrix responses.

(c) Six HIV-1 infected women were recruited for the purpose of whole genome mapping of HIV-specific NK responses. Data are shown only for the two individuals who had responses to Vpu (MP002, MP006) and the one that responded to Tat (MP001), showing the coordinates of the amino acid regions targeted. Peptide-specific responses for CD4 and CD8 T cell responses are shown for these same individuals.

### MP001

|             | Positive response |                      | Identified peptide                                              | Amino acid region spanned                                        |
|-------------|-------------------|----------------------|-----------------------------------------------------------------|------------------------------------------------------------------|
|             | Pool              | Matrix               |                                                                 |                                                                  |
| CD4 T cells | Gag 4             | 31                   | Gag 49                                                          | 354-SHKARVLAEMSQANSA-370                                         |
|             | Env 2             | 11-13                | Env 41, 42, 43                                                  | 292-IRIGPGQAFYTNHIGDIRQAYCNISKQEWNK-323                          |
|             | Env 2             | 16, 17               | Env 46, 47                                                      | 330-KKLQEHPNKTIKFNSSSGDLEI-353                                   |
|             | Nef 2             | 45                   | Nef 17                                                          | 66-EVGFPVRPQVPLRPM-80                                            |
|             | Tat               | 11-13                | Tat 1, 2, 3                                                     | 1-MEPIDPNLEPWNHPGSQPNTPCNNCYCKHCSYH-33                           |
|             | Tat               | 16, 17               | Tat 6, 7                                                        | 40-TKGLGISYGRKKRRRQRSTPPSSEDH-65                                 |
| CD8 T cells | Gag 1             | 27                   | Gag 3                                                           | 17-EKIRLRPGGKHKHYMLKHL-34                                        |
|             | Gag 1             | 34, 35               | Gag 10, 11                                                      | 63-QLQPALQTGTEELRSLYNTVATLY-86                                   |
|             | Gag 1             | 38                   | Gag 14                                                          | 92-IEVRDTKEALDKIEEQNK-110                                        |
|             | Gag 2             | 27                   | Gag 17                                                          | 118-KAAADKGKVSQNYPIV-132                                         |
|             | Gag 2             | 34, 35               | Gag 24, 25                                                      | 167-PMFTALSEGATPQDLNMLNTVGGH-191                                 |
|             | Gag 2             | 38                   | Gag 28                                                          | 198-LKDTINEEAAEWDRHPV-215                                        |
|             | Pol 2             | 6, 7                 | Pol 30, 31                                                      | 238-FWEVQLGIPHPAGLKKKSVTVLDV-262                                 |
|             | Pol 2             | 12-17                | Pol 36, 37, 38, 39, 40, 41                                      | 284-PSINNETPGIRYQYNVLPQGWKGSFAIFQASMTKILEPFRAKNPEIYI-332         |
|             | Pol 4             | 6, 7                 | Pol 78, 79                                                      | 590-TFYVDGAANRETKIGKAGYVTDGR-614                                 |
|             | Pol 4             | 12-17                | Pol 84, 85, 86, 87, 88, 89                                      | 635-LALQDSESEVNIIVTDSQYALGIIQAQPDSESELVNIIEQLIKKERAYLSWVPAHK-691 |
|             | Env 2             | 6, 7                 | Env 36, 37                                                      | 257-IRSENLNNTVKTIVHLNESIGIV-280                                  |
|             | Env 2             | 12-17                | Env 42, 43, 44, 45, 46, 47                                      | 300-FYTNHIGDIRQAYCNISKQEWNKTLLEEVKRLQEHPNKTIKFNSSSGDLEI-353      |
|             | Env 4             | 6, 7                 | Env 84, 85                                                      | 601-MQWDREINNYTNIYQLLEDSQI-623                                   |
|             | Env 4             | 12-17                | Env 90, 91, 92, 93, 94, 95                                      | 644-WFSITNWLWYIKIFIMIVGGLIGLRIIFAVLSIVNRVRQGYSPFSQTLTPNPR-697    |
|             | Nef 2             | 40                   | Nef 12                                                          | 46-SNTAHNNPDCAWLQA-60                                            |
|             | Nef 2             | 44-46                | Nef 16, 17, 18                                                  | 62-EEEEEVGFPVRPQVPLRPMYKA-84                                     |
|             | Vif 1             | 12-17                | Vif 5, 6, 7, 8, 9, 10                                           | 33-RRANGWFYRHHYESRHPKVSSEVHIPLGEARLVIKTYWGLQTGERDWHLGHGVSIEW-89  |
| Tat         | 12-17             | Tat 2, 3, 4, 5, 6, 7 | 8-LEPWNHPGSQPNTPCNNCYCKHCSYHCLVCFQTKGLGISYGRKKRRRQRSTPPSSEDH-65 |                                                                  |
| NK+         | Env 2             | 11, 12               | Env 41, 42                                                      | 292-IRIGPGQAFYTNHIGDIRQAYCNI-316                                 |
|             | Env 2             | 15-17                | Env 45, 46, 47                                                  | 322-NKTLEEVKRLQEHPNKTIKFNSSSGDLEI-353                            |
|             | Tat               | 11, 12               | Tat 1, 2                                                        | 1-MEPIDPNLEPWNHPGSQPNTPCNNCY-26                                  |
|             | Tat               | 15-17                | Tat 5, 6, 7                                                     | 32-YHCLVCFQTKGLGISYGRKKRRRQRSTPPSSEDH-65                         |

### MP002

|             | Positive response |        | Identified peptide | Amino acid region spanned          |
|-------------|-------------------|--------|--------------------|------------------------------------|
|             | Pool              | Matrix |                    |                                    |
| CD8 T cells | Gag 3             | 30     | Gag 34             | 238-STLQEQIAWMTSNPPVPV-255         |
|             | Gag 3             | 36, 37 | Gag 40, 41         | 285-GPKEPFRDYVDRFFKTLRAEQATQDV-310 |
|             | Env 4             | 23     | Env 77             | 551-RVLAIERYLKQDQLLGLW-568         |
|             | Env 4             | 2      | Env 80             | 573-KLICITNVPWNSSWSNK-589          |

|     |       |        |            |                                          |
|-----|-------|--------|------------|------------------------------------------|
|     | Nef 2 | 39     | Nef 11     | 42-ALTSSNTAHNNPDCA-56                    |
|     | Nef 2 | 48     | Nef 20     | 78-RPMTYKAAFDSLFFL-92                    |
| NK+ | Env 1 | 21, 23 | Env 3, 5   | 17-GILGFWMLMICSQVGNLWVTIYYGVPVWREAK-48   |
|     | Env 1 | 4      | Env 10     | 65-RNVWATHACVPTDPNPQEI-83                |
|     | Env 1 | 7      | Env 13     | 87-NVTENFNMWKNMVDQMH-104                 |
|     | Env 1 | 17     | Env 23     | 159-VYALFYKPDIVPINESEY-176               |
|     | Env 2 | 21, 23 | Env 27, 29 | 192-KVSFDPIPIHYCAPAGYAILKCNKTFNGTGPC-224 |
|     | Env 2 | 7      | Env 37     | 264-NNVKTIIVHLNESIGIV-280                |
|     | Env 2 | 17     | Env 47     | 338-NKTIKFNSSSGDLEI-353                  |
|     | Vpu   | 23     | Vpu 1      | 1-MLDLLAKVDYRLGVGALI-18                  |
|     | Vpu   | 4      | Vpu 6      | 43-KIDWLIKRIRERAEDSGNES-62               |
|     | Vpu   | 7      | Vpu 9      | 70-STMVDMGHLRLLDVNDL-86                  |

## MP006

|             | Positive response |              | Identified peptide | Amino acid region spanned                                                                                            |
|-------------|-------------------|--------------|--------------------|----------------------------------------------------------------------------------------------------------------------|
|             | Pool              | Matrix       |                    |                                                                                                                      |
| CD4 T cells | Gag 3             | 25-36        | Gag 29- 40         | 206-AAEWDRLHPVHAGPIAPGQMREPRGSDIAGTTSTLQEQIAWMTSNPPVPVGDYIKRWIILGLNKIVRMYSVPSILDIK<br>QGPKEPFRDYDRFFKTLR-302         |
|             | Gag 3             | 38           | Gag 42             |                                                                                                                      |
|             | Env 1             | 19           | Env 1              | 1-MRVRGIQRNWPQWWIWI-18                                                                                               |
|             | Env 1             | 23, 24, 7    | Env 5, 6, 7        | 32-NLWVTIYYGVPVWREAKTTLFCASDAKAYDR-62                                                                                |
|             | Env 1             | 7-10         | Env 13, 14, 15, 16 | 87-NVTENFNMWKNMVDQMHEDIINLWDQSLKPCVKLTPL-124                                                                         |
|             | Env 1             | 14, 15       | Env 20, 21         | 133-YNGSDTNDMRNCSFNTTTEIRDKKQTVY-160                                                                                 |
|             | Env 1             | 18           | Env 24             | 167-DIVPINESEYILHCNTSTI-186                                                                                          |
|             | Nef 3             | 39-42, 44-48 | Nef 21 -24, 26-30  | 82-YKAAFDSLFFLKEKGGLEGLIHSKRRQDILDWVYHTQGYFPDQWQNYTPGP-132                                                           |
| CD8 T cells | Gag 1             | 25-37        | Gag 1 - 13         | 1-MGARASILRGKLDKWEKIRLRPGGKHYMLKHLVWASRELERFALNPGLLETSEGCKQIMKQLQPALQTGTEELRSL<br>YNTVATLYCVHAGIEVRDTKEAL-101        |
|             | Gag 3             | 25-37        | Gag 29- 41         | 206-AAEWDRLHPVHAGPIAPGQMREPRGSDIAGTTSTLQEQIAWMTSNPPVPVGDYIKRWIILGLNKIVRMYSVPSILDIK<br>QGPKEPFRDYDRFFKTLRAEQATQDV-310 |
|             | Pol 1-4           | 1-24         | Pol 1-92           | 32-711                                                                                                               |
|             | Env 1-5           | 1-24         | Env 1-114          | 1-835                                                                                                                |
|             | Nef 1-5           | 39-48        | Nef 1-50           | 2-207                                                                                                                |
|             | Vif 1, 2          | 1-24         | Vif 1-24           | 1-192                                                                                                                |
|             | Vpr               | 8-18         | Vpr 1-11           | 1-96                                                                                                                 |
|             | Rev               | 1-10, 21-24  | Rev 1-14           | 1-107                                                                                                                |
|             | Vpu               | 1-7, 23, 24  | Vpu 1-9            | 1-86                                                                                                                 |
| NK+         | Env 1             | 21, 23, 24   | Env 3, 5, 6        | 17-GILGFWMLMICSQVGNLWVTIYYGVPVWREAKTTLFCA-54                                                                         |
|             | Env 1             | 11           | Env 17             | 115-LKPCVKLTPLCVTLK-129                                                                                              |
|             | Vpu               | 23, 24       | Vpu 1, 2           | 1-MLDLLAKVDYRLGVGALIVALIIAIV-26                                                                                      |

Amino acid coordinates at the start and end of each region are given according to their positions on Du179 (Env), Consensus C (Vpu, Vif, Vpr, Gag), Du151 (Nef) and Du422 (Tat, Pol, Rev) (Genbank accession numbers AY043174, consensus C of Jan 2002, AY043173 and AY043175, respectively; Los Alamos <http://www.hiv.lanl.gov>).
